# Supplementary material for: White-Light GaN-μLEDs Employing Green/Red Perovskite Quantum Dots as Color Converters for Visible Light Communication
Source: MDPI journal article supplement (doi:10.3390/nano12040627), 2022-02-13
Supplement: s1 [file s1]

Supplementary Material

# White-Light GaN- $\mu$ LEDs Employing Green/Red Perovskite Quantum Dots as Color Converters for Visible Light Communication

Xiaoyan Liu <sup>1</sup>, Langyi Tao <sup>1</sup>, Shiliang Mei <sup>2</sup>, Zhongjie Cui <sup>2</sup>, Daqi Shen <sup>1</sup>, Zhengxuan Sheng <sup>1</sup>, Jinghao Yu <sup>1</sup>, Pengfei Ye <sup>1</sup>, Ting Zhi <sup>1</sup>, Tao Tao <sup>3</sup>, Lei Wang <sup>1,\*</sup>, Ruiqian Guo <sup>2,\*</sup> and Pengfei Tian <sup>2,\*</sup>

- <sup>1</sup> College of Integrated Circuit Science and Engineering, and National and Local Joint Engineering Laboratory for RF Integration and Micro-Packaging Technologies, Nanjing University of Posts and Telecommunications, Jiangsu, Nanjing 210023, China; xiaoyanliu@njupt.edu.cn (X.L.); b18020227@njupt.edu.cn (L.T.); b18020308@njupt.edu.cn (D.S.); b18012128@njupt.edu.cn (Z.S.); 1020021023@njupt.edu.cn (J.Y.); 1320027525@njupt.edu.cn (P.Y.); zhit@njupt.edu.cn (T.Z.)
  - <sup>2</sup> Institute for Electric Light Sources, School of Information Science and Technology, Fudan University, Shanghai 200433, China; meishiliang@fudan.edu.cn (S.M.); 19110720020@fudan.edu.cn (Z.C.)
  - <sup>3</sup> Key Laboratory of Advanced Photonic and Electronic Materials, School of Electronic Science and Engineering, Nanjing University, Jiangsu, Nanjing 210046, China; ttiao@nju.edu.cn
- \* Correspondence: leiWang1980@njupt.edu.cn (L.W.); rquguo@fudan.edu.cn (R.G.); pftian@fudan.edu.cn (P.T.)

**Citation:** Liu, X.; Tao, L.; Mei, S.; Cui, Z.; Shen, D.; Sheng, Z.; Yu, J.; Ye, P.; Zhi, T.; Tao, T.; et al. White-Light GaN- $\mu$ LEDs Employing Green/Red Perovskite Quantum Dots as Color Converters for Visible Light Communication. *Nanomaterials* **2022**, *12*, 627. <https://doi.org/10.3390/nano12040627>

Academic Editor(s): Mohammed Jaouad Meziani and Wolfgang Heiss

Received: date: 12 January 2022

Accepted: date: 09 February 2022

Published: 13 February 2022

**Publisher's Note:** MDPI stays neutral with regard to jurisdictional claims in published maps and institutional affiliations.

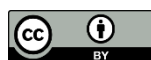

**Copyright:** © 2022 by the authors. Licensee MDPI, Basel, Switzerland. This article is an open access article distributed under the terms and conditions of the Creative Commons Attribution (CC BY) license (<https://creativecommons.org/licenses/by/4.0/>).

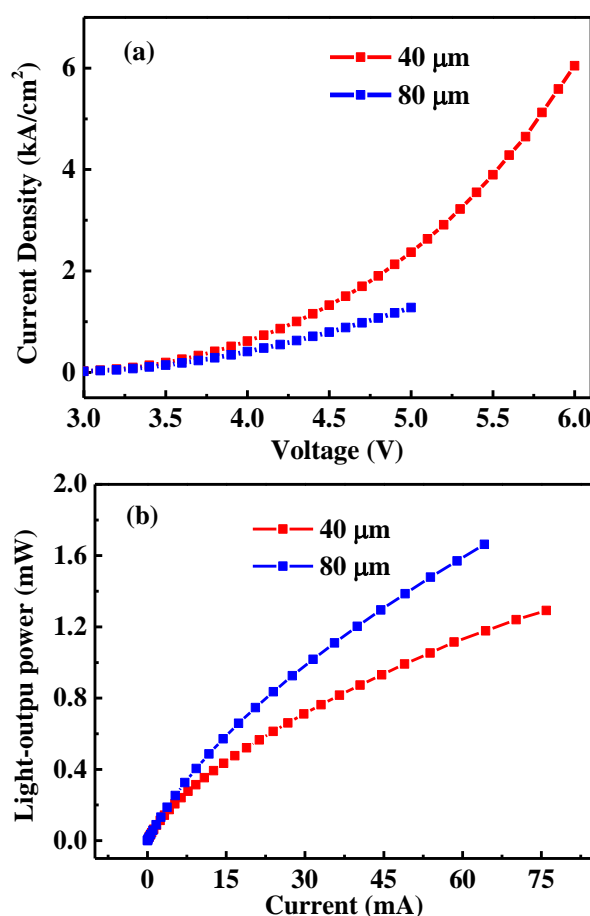

**Figure S1.** (a) J–V and (b) L–I characteristics of the square InGaN- $\mu$ LEDs with different sizes.

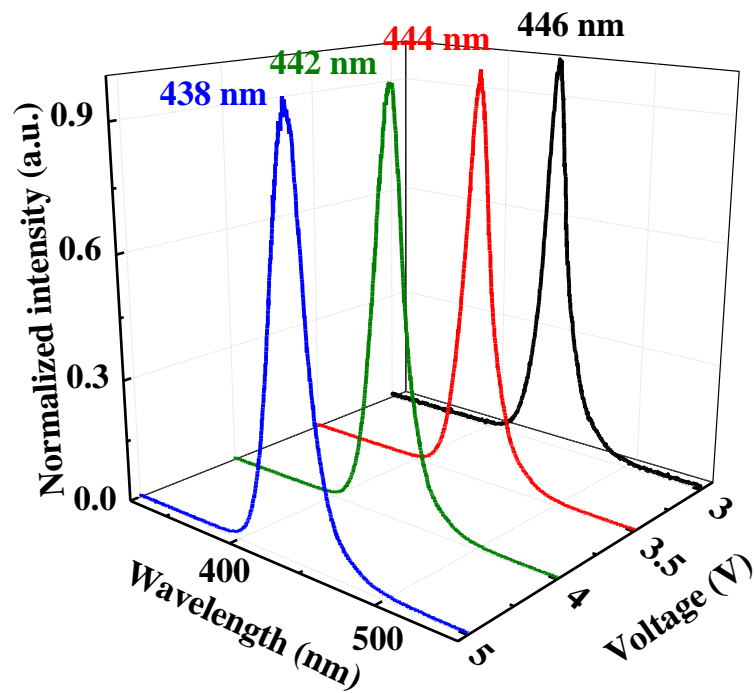

**Figure S2.** The normalized EL spectra of the square  $\mu$ LED with a side length of 80  $\mu\text{m}$  under different applied voltages from 3 V to 5 V.

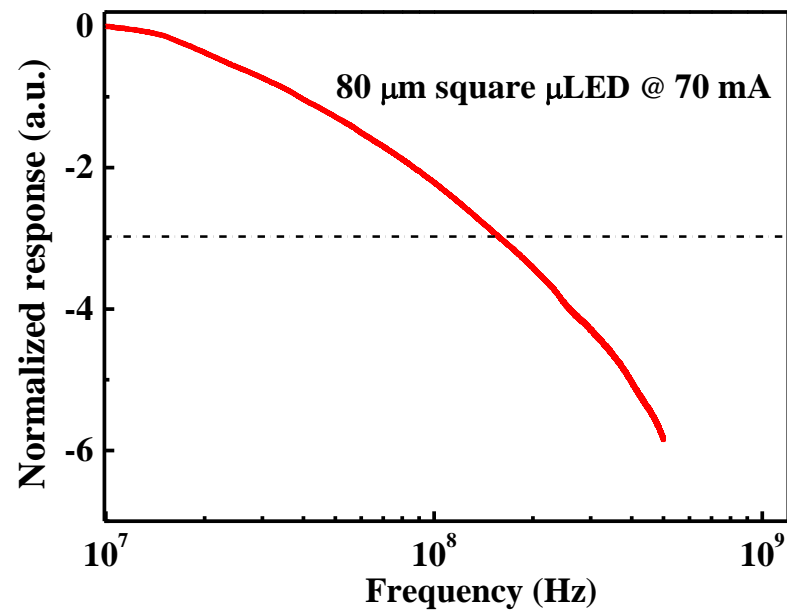

**Figure S3.** The normalized response of the square  $\mu$ LED with a side length of 80  $\mu\text{m}$  under a current of 70 mA. The dashed line is to label the -3 dB bandwidth.
